# Supplementary material
Source: MDPI journal article supplement (https://www.mdpi.com/2071-1050/15/10/8148)
Supplement: s1 [file s1]

**Supplementary material: Table S1** - Socio-environmental variables found in the research and considered predictors for the incidence of Dengue, Zika, Chikungunya and/or for the proliferation of vectors of the genus *Aedes* through the abundance of breeding sites.

| Article | Mainland region       | Variables                     |             |            |            |              |             |                   |           |                |                  |               |            |           |             |               |           | Evaluated arboviruses/<br>Vector | People involved                        |                        | Incidence of arboviruses                     |
|---------|-----------------------|-------------------------------|-------------|------------|------------|--------------|-------------|-------------------|-----------|----------------|------------------|---------------|------------|-----------|-------------|---------------|-----------|----------------------------------|----------------------------------------|------------------------|----------------------------------------------|
|         |                       | Sanitation                    |             |            |            | Climatologic |             |                   |           |                | Integrative      |               |            |           |             |               |           |                                  | Number of cases                        | Period/year considered |                                              |
|         |                       | Water                         | Solid Waste | Sewage     | Draining   | Rainfall     | Temperature | Relative humidity | OMV*      | Climate Type** | Sociodemographic | Socioeconomic | Geography  | Housing   | Soil use*** | Sociocultural | Altitude  |                                  |                                        |                        |                                              |
| [49]    | South America         | AG1, AG4: p<0,01              | -           | -          | -          | -            | -           | -                 | -         | -              | -                | -             | -          | -         | -           | -             | -         | Aedes aegypti                    | -                                      | -                      | -                                            |
| [53]    | Southeast Asia        | AG4: p<0,01                   | X           | -          | -          | -            | -           | -                 | -         | -              | X                | -             | -          | -         | -           | -             | -         | Aedes aegypti                    | -                                      | -                      | -                                            |
| [87]    | South America         | -                             | X           | -          | -          | -            | -           | -                 | -         | -              | -                | X             | -          | -         | -           | -             | -         | Aedes aegypti                    | -                                      | -                      | -                                            |
| [71]    | Southeast Asia        | AG1: OR = 3,46                | X           | -          | -          | -            | -           | -                 | -         | -              | X                | -             | -          | -         | -           | X             | -         | Dengue (FHD)                     | 341                                    | 2007                   | 88,5 % SDenv                                 |
| [67]    | Southeast Asia        | AG1: OR = 0,91                | X           | -          | -          | -            | -           | -                 | -         | -              | X                | -             | -          | -         | -           | -             | -         | Dengue                           | ≥194                                   | 2011                   | 4,07 %SDenv                                  |
| [58]    | Central America       | -                             | X           | -          | -          | -            | -           | -                 | -         | -              | X                | -             | -          | -         | -           | -             | -         | Aedes aegypti                    | -                                      | -                      | -                                            |
| [70]    | Southeast Asia        | AG4: OR = 1,53                | X           | -          | -          | -            | -           | -                 | -         | -              | -                | -             | -          | -         | -           | -             | -         | Chikungunya                      | 84                                     | 2012                   | 69 % Chikv                                   |
| [88]    | Southeast Asia        | -                             | -           | -          | -          | X            | X           | X                 | -         | -              | -                | -             | -          | -         | -           | -             | -         | Dengue (FHD)                     | -                                      | -                      | -                                            |
| [81]    | Southeast Asia        | -                             | -           | -          | -          | X            | -           | -                 | -         | -              | X                | -             | -          | -         | -           | -             | -         | Dengue (FHD)                     | -                                      | -                      | -                                            |
| [74]    | South America         | AG2: p<0,05                   | -           | -          | -          | -            | -           | -                 | -         | -              | -                | -             | X          | -         | -           | -             | -         | Dengue                           | 72060                                  | 2010 to 2014           | 64,0 % SDenv                                 |
| [60]    | West Asia             | -                             | -           | -          | X          | -            | -           | -                 | -         | -              | X                | -             | X          | -         | -           | -             | -         | Dengue                           | 650                                    | 2007                   | 37,5 % SDenv                                 |
| [59]    | South Asia            | AG4: OR = 5,61                | -           | -          | -          | -            | -           | -                 | -         | -              | -                | -             | X          | -         | -           | -             | -         | Chikungunya                      | 898                                    | 2007                   | 39,9 % Chikv                                 |
| [66]    | Southeast Asia        | AG4: p = 0,015                | -           | -          | -          | -            | -           | -                 | -         | -              | X                | -             | -          | -         | -           | -             | -         | Dengue                           | -                                      | -                      | -                                            |
| [78]    | South America         | AG1: p=0,0431                 | X           | X          | -          | X            | X           | X                 | -         | -              | X                | -             | -          | -         | -           | -             | -         | Dengue                           | 551206                                 | 2001 to 2012           | -                                            |
| [72]    | South America         | -                             | X           | X          | -          | -            | -           | -                 | -         | X              | X                | X             | -          | -         | -           | -             | -         | Dengue                           | -                                      | -                      | Average 250/100.000 inhab.                   |
| [89]    | South Asia            | -                             | -           | -          | -          | X            | X           | -                 | -         | -              | -                | -             | -          | -         | -           | -             | -         | Dengue                           | 86000                                  | 2006 to 2017           | -                                            |
| [82]    | South America         | -                             | -           | -          | -          | X            | -           | -                 | -         | -              | -                | -             | -          | -         | -           | -             | -         | Dengue                           | 79455                                  | 2016                   | -                                            |
| [77]    | South Asia            | -                             | -           | -          | -          | X            | X           | -                 | -         | -              | -                | -             | -          | -         | -           | -             | -         | Dengue                           | -                                      | -                      | -                                            |
| [76]    | South America         | -                             | -           | -          | -          | X            | X           | X                 | X         | -              | -                | -             | -          | -         | -           | -             | -         | Dengue                           | -                                      | -                      | >300/100.000 inhab.                          |
| [63]    | Asia (many countries) | -                             | -           | -          | -          | X            | -           | -                 | -         | -              | -                | -             | -          | -         | -           | -             | -         | Dengue                           | -                                      | -                      | -                                            |
| [64]    | Eastern Asia          | -                             | -           | -          | -          | X            | X           | -                 | -         | -              | -                | -             | -          | -         | -           | -             | -         | Dengue                           | -                                      | -                      | -                                            |
| [62]    | South Asia            | -                             | -           | -          | -          | X            | X           | -                 | -         | -              | -                | -             | -          | -         | -           | -             | -         | Dengue                           | 5724                                   | 2008                   | -                                            |
| [55]    | Southeast Asia        | -                             | -           | -          | -          | -            | -           | -                 | -         | -              | -                | -             | -          | -         | -           | -             | -         | Dengue (FHD)                     | -                                      | -                      | -                                            |
| [51]    | South America         | -                             | -           | -          | -          | X            | X           | X                 | -         | -              | -                | -             | -          | -         | -           | -             | -         | Dengue                           | 12008                                  | 1997 to 2002           | -                                            |
| [54]    | South America         | -                             | -           | -          | -          | X            | X           | X                 | X         | -              | -                | -             | -          | -         | -           | -             | -         | Aedes aegypti                    | -                                      | -                      | -                                            |
| [83]    | South Asia            | -                             | -           | -          | -          | X            | X           | X                 | -         | -              | -                | -             | -          | -         | -           | -             | -         | Dengue                           | -                                      | -                      | -                                            |
| [90]    | South America         | -                             | X           | -          | -          | X            | X           | X                 | -         | -              | -                | -             | -          | -         | -           | -             | -         | Dengue, Chikungunya              | Denv (1323); Chikv (1705)              | 2016 to 2019           | -                                            |
| [96]    | South America         | -                             | X           | -          | -          | X            | X           | -                 | -         | -              | X                | -             | -          | -         | X           | -             | -         | Aedes aegypti                    | -                                      | -                      | -                                            |
| [85]    | Southeast Asia        | -                             | X           | -          | -          | X            | X           | -                 | -         | -              | -                | -             | -          | X         | -           | -             | -         | Dengue (FHD)                     | 349                                    | 2014                   | -                                            |
| [79]    | South America         | AG1: Zikv (5,7); Chikv (15,1) | X           | X          | X          | X            | X           | -                 | -         | -              | X                | -             | -          | -         | X           | -             | X         | Zika, Chikungunya                | Zikv (255229), Chikv (285700)          | 2015 to 2016           | -                                            |
| [68]    | Southeast Asia        | -                             | -           | -          | -          | X            | X           | -                 | -         | -              | -                | -             | -          | -         | -           | -             | -         | Dengue                           | -                                      | -                      | -                                            |
| [65]    | South America         | -                             | -           | -          | -          | -            | X           | -                 | -         | -              | X                | -             | X          | -         | -           | -             | -         | Dengue                           | -                                      | -                      | -                                            |
| [86]    | South Asia            | -                             | -           | -          | X          | -            | X           | X                 | X         | -              | -                | -             | X          | -         | X           | -             | -         | Dengue                           | -                                      | -                      | -                                            |
| [75]    | South America         | AG1: r=-0,47; p<0,000         | -           | -          | -          | X            | -           | -                 | -         | -              | -                | -             | -          | -         | -           | -             | -         | Dengue, Zika, Chikungunya        | 3916                                   | 2015 to 2016           | SDenv (43,8 %); SZikv (55,4%); SChikv (<1 %) |
| [84]    | Central America       | AG1,AG4: p<=0,01              | X           | X          | X          | -            | -           | -                 | -         | -              | -                | X             | X          | -         | -           | -             | -         | Aedes aegypti                    | -                                      | -                      | -                                            |
| [50]    | South Asia            | AG4: r²=0,958                 | X           | -          | -          | -            | -           | -                 | -         | -              | -                | X             | -          | X         | -           | X             | -         | Dengue                           | -                                      | -                      | -                                            |
| [92]    | South Asia            | AG4: risco alto (>15 dias)    | X           | -          | -          | -            | -           | -                 | -         | -              | -                | X             | -          | -         | -           | X             | -         | Aedes aegypti                    | -                                      | -                      | -                                            |
| [93]    | South America         | -                             | X           | -          | -          | -            | -           | -                 | -         | -              | X                | -             | -          | -         | -           | -             | -         | Dengue, Zika, Chikungunya        | Denv (4681); Zikv (2220), Chikv (1366) | 2015 to 2016           | -                                            |
| [69]    | South America         | AG3: DIC=519,022              | X           | -          | -          | -            | -           | -                 | -         | -              | X                | X             | -          | -         | -           | -             | -         | Dengue                           | 21933                                  | 2010                   | 623,99/100.000 inhab.                        |
| [95]    | South America         | AG1: p<0,001                  | -           | X          | -          | X            | -           | -                 | -         | -              | -                | X             | -          | -         | -           | -             | -         | Zika                             | 39331                                  | 2015 to 2016           | -                                            |
| [80]    | South America         | AG2: IRR=1,009                | X           | X          | -          | X            | X           | -                 | -         | -              | -                | X             | -          | X         | -           | -             | -         | Dengue                           | 98339                                  | 2011 to 2015           | 192-1360/100.000 inhab.                      |
| [98]    | South America         | AG3: p<0,413                  | X           | X          | -          | -            | -           | -                 | -         | -              | X                | -             | -          | X         | -           | -             | -         | Dengue                           | 660                                    | 2018                   | -                                            |
| [94]    | South America         | -                             | -           | -          | -          | -            | X           | X                 | X         | -              | X                | X             | -          | -         | -           | -             | X         | Dengue, Zika, Chikungunya        | Denv (10935); Zikv (887), Chikv (242)  | 2007 to 2017           | Average 4.021,3 /100.000 inhab.              |
| [97]    | South Asia            | AG2: OR=3,80                  | -           | -          | -          | -            | X           | -                 | -         | -              | X                | X             | -          | -         | -           | -             | -         | Dengue                           | 160                                    | 2013 to 2015           | 7,6 % SDenv                                  |
| [91]    | North Africa          | -                             | -           | -          | -          | -            | -           | -                 | -         | -              | -                | X             | -          | -         | -           | -             | -         | Dengue                           | 66                                     | 2016 to 2017           | 42,04 % SDenv                                |
| [73]    | South America         | -                             | -           | X          | -          | -            | -           | -                 | -         | -              | X                | X             | X          | -         | -           | -             | -         | Dengue                           | 11760                                  | 2010                   | 4,86/100 inhab.                              |
| [61]    | South Asia            | AG1: p=0,002                  | -           | -          | -          | -            | -           | -                 | -         | -              | X                | -             | -          | -         | -           | -             | -         | Dengue                           | 109                                    | 2011                   | 71,5 % SDenv                                 |
| [57]    | Southeast Asia        | AG3: p<0,001                  | -           | -          | -          | -            | -           | -                 | -         | -              | -                | X             | -          | -         | -           | -             | -         | Dengue (FHD)                     | -                                      | -                      | <400/100.000 inhab.                          |
| [56]    | North America         | -                             | -           | -          | X          | -            | -           | -                 | -         | -              | -                | X             | -          | -         | -           | -             | -         | Dengue                           | 600                                    | 2004                   | 40,0 % SDenv                                 |
| [52]    | South America         | AG1: r=-0,30                  | -           | -          | -          | -            | -           | -                 | -         | -              | X                | X             | -          | -         | -           | -             | -         | Dengue                           | -                                      | -                      | -                                            |
| Total   |                       | 44% (22/50)                   | 38% (19/50) | 18% (8/50) | 10% (5/50) | 42% (21/50)  | 38% (19/50) | 18% (9/50)        | 8% (4/50) | 2% (1/50)      | 40% (20/50)      | 30% (15/50)   | 14% (7/50) | 8% (4/50) | 6% (3/50)   | 6% (3/50)     | 4% (2/50) | -                                | 1,543.387                              | 1997 - 2019            | -                                            |

**Note:** [reference]; Proportion with piped water = AG1; Scarce access to city water infrastructure = AG2; Proportion of permanent particular households whose water supplying method does notpass through the city water system = AG3; Presence of recipient with water and larvae (tires, pots, flower vases and barrels) = AG4; \*Other meteorological variables (Wind speed, gust, sunlight hours, dew points and saturation deficit); \*\*Tropical, subtropical and semi-arid.; \*\*\*Urbanized area, agricultural area and grassland; Odds Ratio = OR; Deviance Information Criterion = DIC; incidente rate ratios = IRR; Dengue Hemorrhagic Fever = FHD; seropositivity for dengue virus (Denv) = SDenv; seropositivity for Zika virus (Zikv) = SZikv; seropositivity for chikungunya virus (Chikv) = SChikv.
